# Supplementary material for: The Optimization of Canola Crop Production through Wheat Residue Management within a Western Canadian Context—A Case Study of Saint-Front, Saskatchewan
Source: MDPI journal article supplement (doi:10.3390/su131810459), 2021-09-20
Supplement: s1 [file s1]

Archive with 1 entries (1 files):
- sustainability-1372904-supplementary.pdf
