# Supplementary material for: The Optimization of Canola Crop Production through Wheat Residue Management within a Western Canadian Context—A Case Study of Saint-Front, Saskatchewan
Source: MDPI journal article supplement (doi:10.3390/su131810459), 2021-09-20
Supplement: s1 [file s1 › sustainability-1372904-supplementary.pdf]

**The optimization of canola crop production through wheat residue management within a western Canadian context – A case study of Saint-Front, Saskatchewan**

**Xiaying Xin,<sup>a,b</sup> Guohe Huang,<sup>b,\*</sup> David Halstead<sup>c</sup>, Katelyn Gaetz<sup>d</sup>, Leila Benmerrouche<sup>c</sup>, Jing Huang<sup>b</sup>, Yuwei Wu<sup>b</sup>, Jinbo Zhang<sup>e</sup>, Yupeng Fu<sup>b</sup> and Nan Wang<sup>b</sup>**

<sup>a</sup> School of Energy and Environment; State Key Laboratory of Marine Pollution (SKLMP), City University of Hong Kong, Kowloon, Hong Kong SAR, China

<sup>b</sup> Institute for Energy, Environment and Sustainable Communities, University of Regina, Regina, Canada S4S 0A2

<sup>c</sup> Saskatchewan Polytechnic, Prince Albert, Canada, S6V 7S4

<sup>d</sup> Prairie Agricultural Machinery Institute, Humboldt, Canada S0K 2A0

<sup>e</sup> Peking University, Beijing, China, 100871

This SI file contains:

7 Pages

4 Figures

## List of figures

**Figure S1.** Field finish in (A) harrow treatment with a 100ft Degelman Strawmaster Pro heavy harrow; (B) tillage treatment with a 40ft Degelman Pro-Till high-speed disc.

**Figure S2.** Sampling site after post-seeding on (A) day 28; (B) day 56.

**Figure S3.** (A) The Canadian light source, (B) *Bruker Vertex 70v Interferometer / Hyperion 3000 IR Microscope on Mid-IR beamline*, (C) *Workstation on VESPERS beamline*.

**Figure S4.** Main effect on moisture corrected yield.

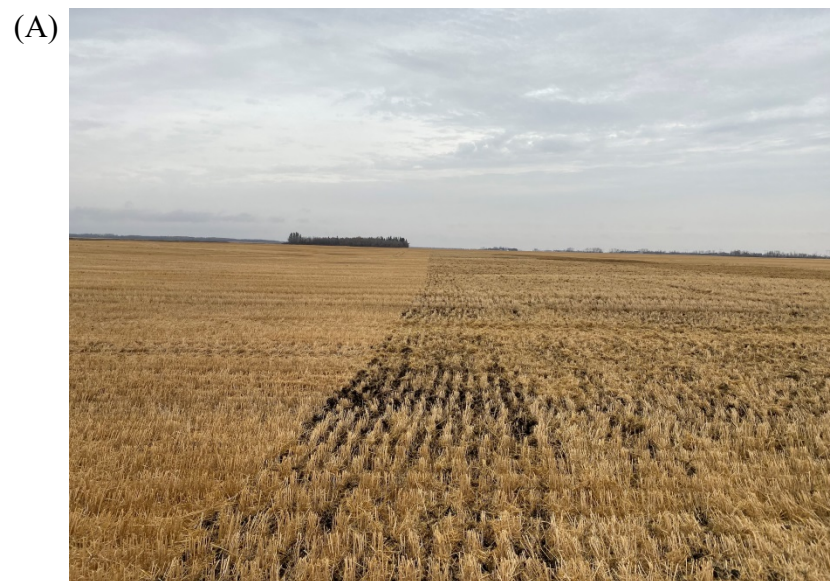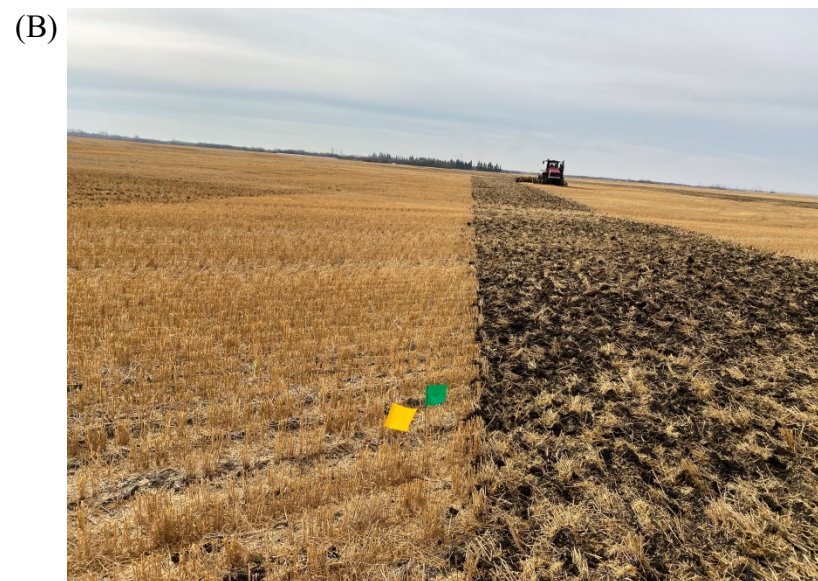

**Figure S1.** Field finish in (A) harrow treatment with a 100ft Degelman Strawmaster Pro heavy harrow; (B) tillage treatment with a 40ft Degelman Pro-Till high-speed disc.

(A)

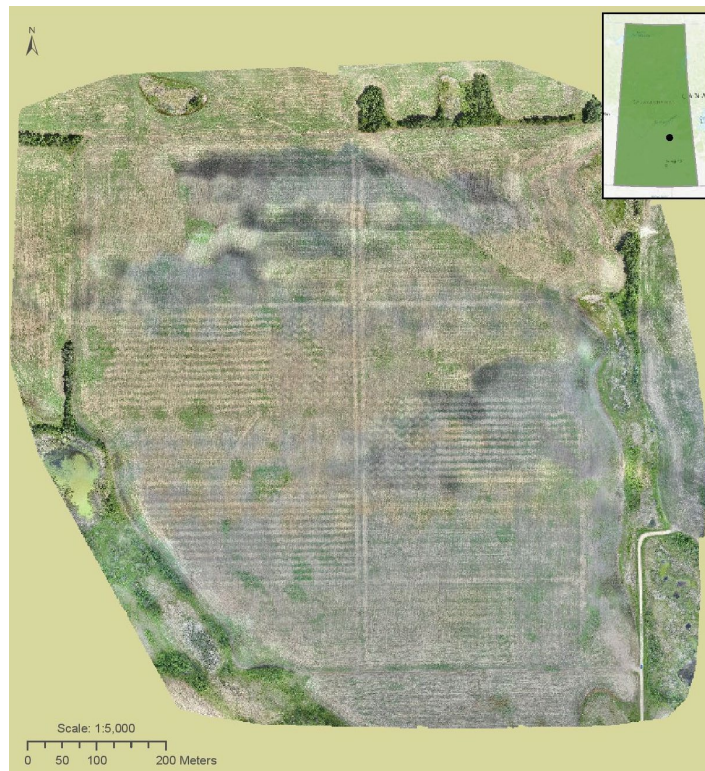

(B)

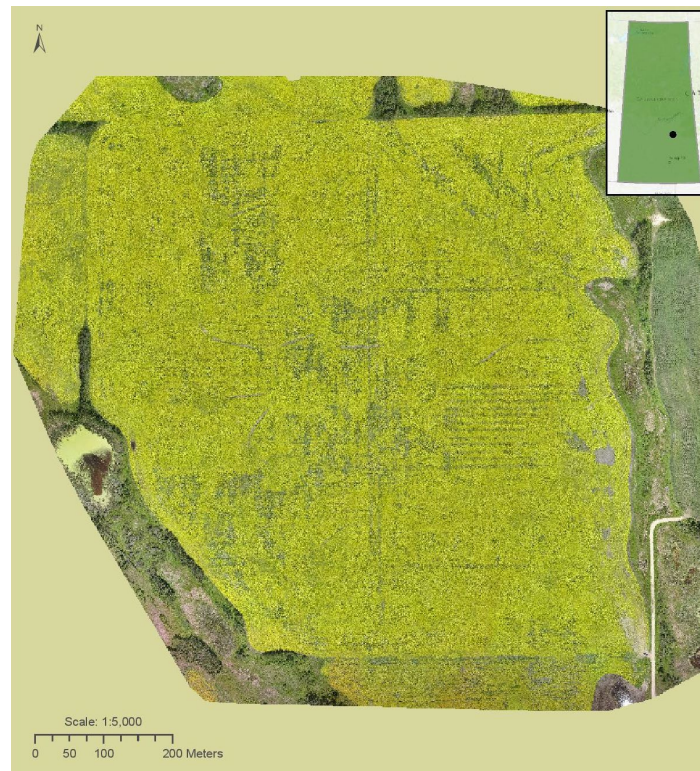

**Figure S2.** Sampling site after post-seeding on (A) day 28; (B) day 56.

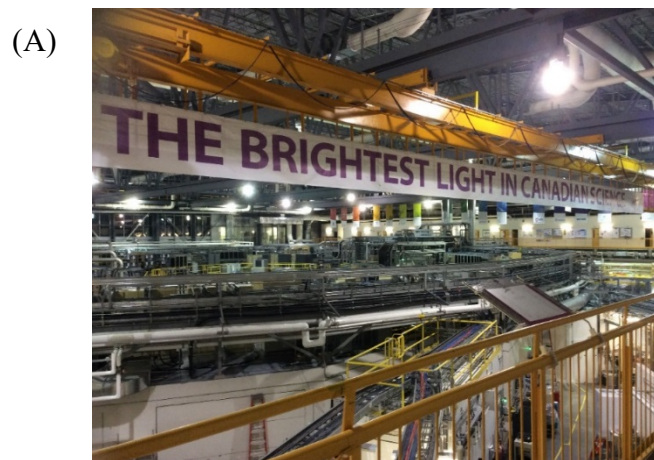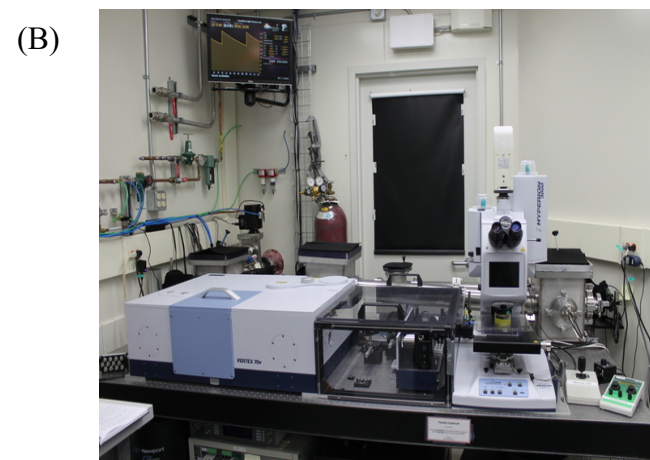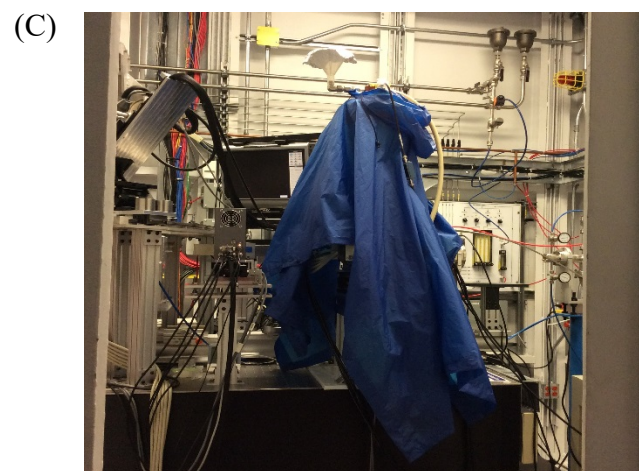

**Figure S3.** (A) The Canadian light source, (B) *Bruker Vertex 70v Interferometer / Hyperion 3000 IR Microscope on Mid-IR beamline*, (C) *Workstation on VESPERS beamline*.<sup>[1]</sup>

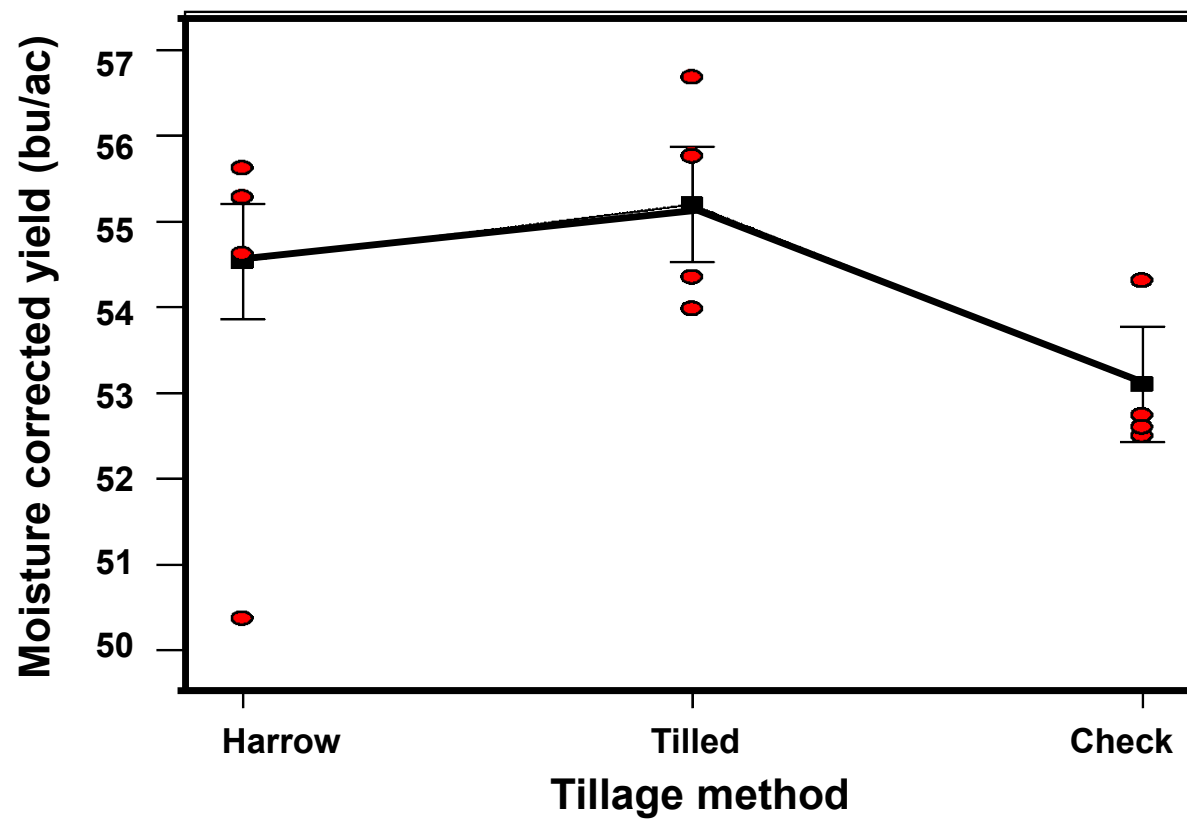

Figure S4. Main effect on moisture corrected yield.

## Reference

1. Xin, X.; Huang, G.; An, C.; Feng, R., Interactive Toxicity of Triclosan and Nano-TiO<sub>2</sub> to Green Alga *Eremosphaera viridis* in Lake Erie: A New Perspective Based on Fourier Transform Infrared Spectromicroscopy and Synchrotron-Based X-ray Fluorescence Imaging. *Environmental Science & Technology* **2019**, 53, (16), 9884-9894.
